# Supplementary material for: The human papillomavirus E6 protein targets apoptosis-inducing factor (AIF) for degradation
Source: PubMed Central journal article supplement (PMC7450093; doi:10.1038/s41598-020-71134-3), 2020-08-26
Supplement: 41598_2020_71134_MOESM1_ESM.pdf [file 41598_2020_71134_MOESM1_ESM.pdf]

# **The human papillomavirus E6 protein targets apoptosis-inducing factor (AIF) for degradation**

Masaru Shimada<sup>1\*</sup>, Akio Yamashita<sup>2</sup>, Manami Saito<sup>1</sup>, Motohide Ichino<sup>3</sup>, Takao Kinjo<sup>4</sup>, Nobuhisa Mizuki<sup>5</sup>, Dennis M. Klinman<sup>6</sup> & Kenji Okuda<sup>1</sup>

<sup>1</sup>Department of Molecular Biodefense Research, Yokohama City University, Yokohama 236-0004, Japan

<sup>2</sup>Department of Molecular Biology, Yokohama City University, Yokohama 236-0004, Japan

<sup>3</sup>Department of Immunology, Yokohama City University, Yokohama 236-0004, Japan

<sup>4</sup>Division of Morphological Pathology, Department of Basic Laboratory Sciences, School of Health Sciences, University of the Ryukyus, Okinawa 903-0215, Japan

<sup>5</sup>Department of Ophthalmology and Visual Science, Yokohama City University, Yokohama 236-0004, Japan

<sup>6</sup>Frederick National Laboratory for Cancer Research, National Cancer Institute, NIH, Frederick, MD 21702, USA

## Supplementary Table S1

| SYNTHESIZED GENE                    |                                                                                                                                                                                                                                                                                                                                                                                                                                                                                                                         | SEQUENCE   |            |
|-------------------------------------|-------------------------------------------------------------------------------------------------------------------------------------------------------------------------------------------------------------------------------------------------------------------------------------------------------------------------------------------------------------------------------------------------------------------------------------------------------------------------------------------------------------------------|------------|------------|
| Synthetic, codon-optimized HPV16 E6 | ATGCATCAGAAACGGACCGCAATGTTTCAGGATCCTCAGGAGCGGCCCGCAAGCTCCCC<br>CAGCTGTGTACCGAGCTGCAGACAACCATCCACGACATCATACTGGAATGTGTTTACTGCA<br>AACAACAGCTCCTCAGAAGAGAAGTTTATGATTTTGCCTTCAGAGACCTGTGCATTGTTTA<br>CAGGGATGGTAATCCGTATGCCGTCTGCGATAAGTGTCTGAAATTCTACTCCAAGATCAGC<br>GAGTACCGGCACTACTGTTACAGCCTGTACGGGACCACACTCGAACAACAGTACAACAAG<br>CCACTCTGTGACCTGCTTATCAGGTGTATTAAGTGTGTCAGAAACCCCTGTGCCCAGAAGAGA<br>AGCAGCGGCATCTGGACAAGAAGCAGCGCTTCCACAATATTAGAGGCCGCTGGACTGGCA<br>GGTGTATGTCATGCTGTAGATCCAGTCGCACGAGACGGGAAACTCAATTG |            |            |
| Synthetic, codon-optimized HPV6 E6  | ATGGAATCTGCCAATGCCTCAACGAGTGCTACCACCATAGACCAACTGTGCAAGACCTTCA<br>ATCTGTCCATGCACACCCTTCAGATTAAGTGCCTCTTTTGCAAGAATGCACTCACAAGTGC<br>CGAGATCTACAGCTACGCCTACAAACAGCTGAAAGTGCTGTTTAGGGGTGGCTATCCTTAT<br>GCCGCTTGTGCATGCTGTCTGGAGTTCCATGGCAAGATCAACCAGTACCGACATTTGAC<br>TATGCGGGATATGCAACAACCGTAGAGGAAGAGACAAAGCAGGACATTCTGGATGTTCTC<br>ATTCGGTGCTACTTGTGTCACAAGCCATTGTGCGAAGTGGAAAAGGTGAAACACATCCTTA<br>CTAAAGCTCGCTTTATCAAGCTGAACTGTAAGTGGAAAGGGAGATGTCTCCATTGCTGGAC<br>AACGTGTATGGAGGATATGCTGCCctga                        |            |            |
| OLIGONUCLEOTIDES                    |                                                                                                                                                                                                                                                                                                                                                                                                                                                                                                                         | SEQUENCE   |            |
| pCASSG (EcoR I) Forward             | ACTCCTCAGGTGCAGGCTGCCTATCAGAA                                                                                                                                                                                                                                                                                                                                                                                                                                                                                           |            |            |
| pCAGGS (EcoR I) Reverse             | TTTGCCAAAATGATGAGACAG                                                                                                                                                                                                                                                                                                                                                                                                                                                                                                   |            |            |
| RECOMBINANT DNA                     | TRANSGENE(S)                                                                                                                                                                                                                                                                                                                                                                                                                                                                                                            | SOURCE     | IDENTIFIER |
| Plasmid: pCAGGS-AIF-HA              | AIF-HA                                                                                                                                                                                                                                                                                                                                                                                                                                                                                                                  | This paper | N/A        |
| Plasmid: pCAGGS-GFP-HA              | GFP-HA                                                                                                                                                                                                                                                                                                                                                                                                                                                                                                                  | This paper | N/A        |
| Plasmid: pCAGGS-HPV16E6-SBP         | HPV16E6-SBP                                                                                                                                                                                                                                                                                                                                                                                                                                                                                                             | This paper | N/A        |
| Plasmid: pCAGGS-GFP-SBP             | GFP-SBP                                                                                                                                                                                                                                                                                                                                                                                                                                                                                                                 | This paper | N/A        |
| Plasmid: pCAGGS- $\Delta$ 54AIF-HA  | Ubi-54AIF-HA                                                                                                                                                                                                                                                                                                                                                                                                                                                                                                            | This paper | N/A        |
| Plasmid: pCAGGS- $\Delta$ 102AIF-HA | Ubi-102AIF-HA                                                                                                                                                                                                                                                                                                                                                                                                                                                                                                           | This paper | N/A        |
| Plasmid: pCAGGS-HPV6E6-SBP          | HPV6E6-SBP                                                                                                                                                                                                                                                                                                                                                                                                                                                                                                              | This paper | N/A        |
| Plasmid: pCAGGS- $\Delta$ 1         | Ubi-AIF(FAD1)-GFP-HA                                                                                                                                                                                                                                                                                                                                                                                                                                                                                                    | This paper | N/A        |
| Plasmid: pCAGGS- $\Delta$ 2         | Ubi-AIF(NADH)-GFP-HA                                                                                                                                                                                                                                                                                                                                                                                                                                                                                                    | This paper | N/A        |
| Plasmid: pCAGGS- $\Delta$ 3         | Ubi-AIF(FAD2)-GFP-HA                                                                                                                                                                                                                                                                                                                                                                                                                                                                                                    | This paper | N/A        |
| Plasmid: pCAGGS- $\Delta$ 4         | Ubi-AIF(C terminal)-GFP-HA                                                                                                                                                                                                                                                                                                                                                                                                                                                                                              | This paper | N/A        |
| Plasmid: pCAGGS- $\Delta$ 5         | Ubi-AIF(NADH-FAD2-C terminal)-HA                                                                                                                                                                                                                                                                                                                                                                                                                                                                                        | This paper | N/A        |
| Plasmid: pCAGGS- $\Delta$ 6         | Ubi-AIF (FAD1-FAD2-C terminal)-HA                                                                                                                                                                                                                                                                                                                                                                                                                                                                                       | This paper | N/A        |
| Plasmid: pCAGGS- $\Delta$ 7         | Ubi-AIF (FAD1-NADH-C terminal)-HA                                                                                                                                                                                                                                                                                                                                                                                                                                                                                       | This paper | N/A        |
| Plasmid: pCAGGS- $\Delta$ 8         | Ubi-AIF (FAD1-C terminal)-HA                                                                                                                                                                                                                                                                                                                                                                                                                                                                                            | This paper | N/A        |
| Plasmid: pCAGGS- $\Delta$ 9         | Ubi-AIF (NADH-C terminal)-HA                                                                                                                                                                                                                                                                                                                                                                                                                                                                                            | This paper | N/A        |
| Plasmid: pCAGGS- $\Delta$ 10        | Ubi-AIF (NADH-FAD2-C terminal)-HA                                                                                                                                                                                                                                                                                                                                                                                                                                                                                       | This paper | N/A        |
| Plasmid: pCAGGS- $\Delta$ 11        | Ubi-AIF (FAD1-NADH)-HA                                                                                                                                                                                                                                                                                                                                                                                                                                                                                                  | This paper | N/A        |
| Plasmid: pCAGGS- $\Delta$ 12        | Ubi-AIF (FAD1-NADH-FAD2)-HA                                                                                                                                                                                                                                                                                                                                                                                                                                                                                             | This paper | N/A        |
| Plasmid: pCAGGS-AIF                 | AIF                                                                                                                                                                                                                                                                                                                                                                                                                                                                                                                     | This paper | N/A        |
| Plasmid: pCAGGS-GFP                 | GFP                                                                                                                                                                                                                                                                                                                                                                                                                                                                                                                     | This paper | N/A        |
| Plasmid: pCAGGS                     | Non                                                                                                                                                                                                                                                                                                                                                                                                                                                                                                                     | This paper | N/A        |
| Plasmid: HPV16E6                    | HPV16E6                                                                                                                                                                                                                                                                                                                                                                                                                                                                                                                 | This paper | N/A        |
| Plasmid: HPV6E6                     | HPV6E6                                                                                                                                                                                                                                                                                                                                                                                                                                                                                                                  | This paper | N/A        |
