# Supplementary material for: The human papillomavirus E6 protein targets apoptosis-inducing factor (AIF) for degradation
Source: PubMed Central journal article supplement (PMC7450093; doi:10.1038/s41598-020-71134-3), 2020-08-26

# **The human papillomavirus E6 protein targets apoptosis-inducing factor (AIF) for degradation**

Masaru Shimada<sup>1\*</sup>, Akio Yamashita<sup>2</sup>, Manami Saito<sup>1</sup>, Motohide Ichino<sup>3</sup>, Takao Kinjo<sup>4</sup>, Nobuhisa Mizuki<sup>5</sup>, Dennis M. Klinman<sup>6</sup> & Kenji Okuda<sup>1</sup>

<sup>1</sup>Department of Molecular Biodefense Research, Yokohama City University, Yokohama 236-0004, Japan

<sup>2</sup>Department of Molecular Biology, Yokohama City University, Yokohama 236-0004, Japan

<sup>3</sup>Department of Immunology, Yokohama City University, Yokohama 236-0004, Japan

<sup>4</sup>Division of Morphological Pathology, Department of Basic Laboratory Sciences, School of Health Sciences, University of the Ryukyus, Okinawa 903-0215, Japan

<sup>5</sup>Department of Ophthalmology and Visual Science, Yokohama City University, Yokohama 236-0004, Japan

<sup>6</sup>Frederick National Laboratory for Cancer Research, National Cancer Institute, NIH, Frederick, MD 21702, USA

**Figure S1. Binding of E6 to AIF, Related to Figure 2**

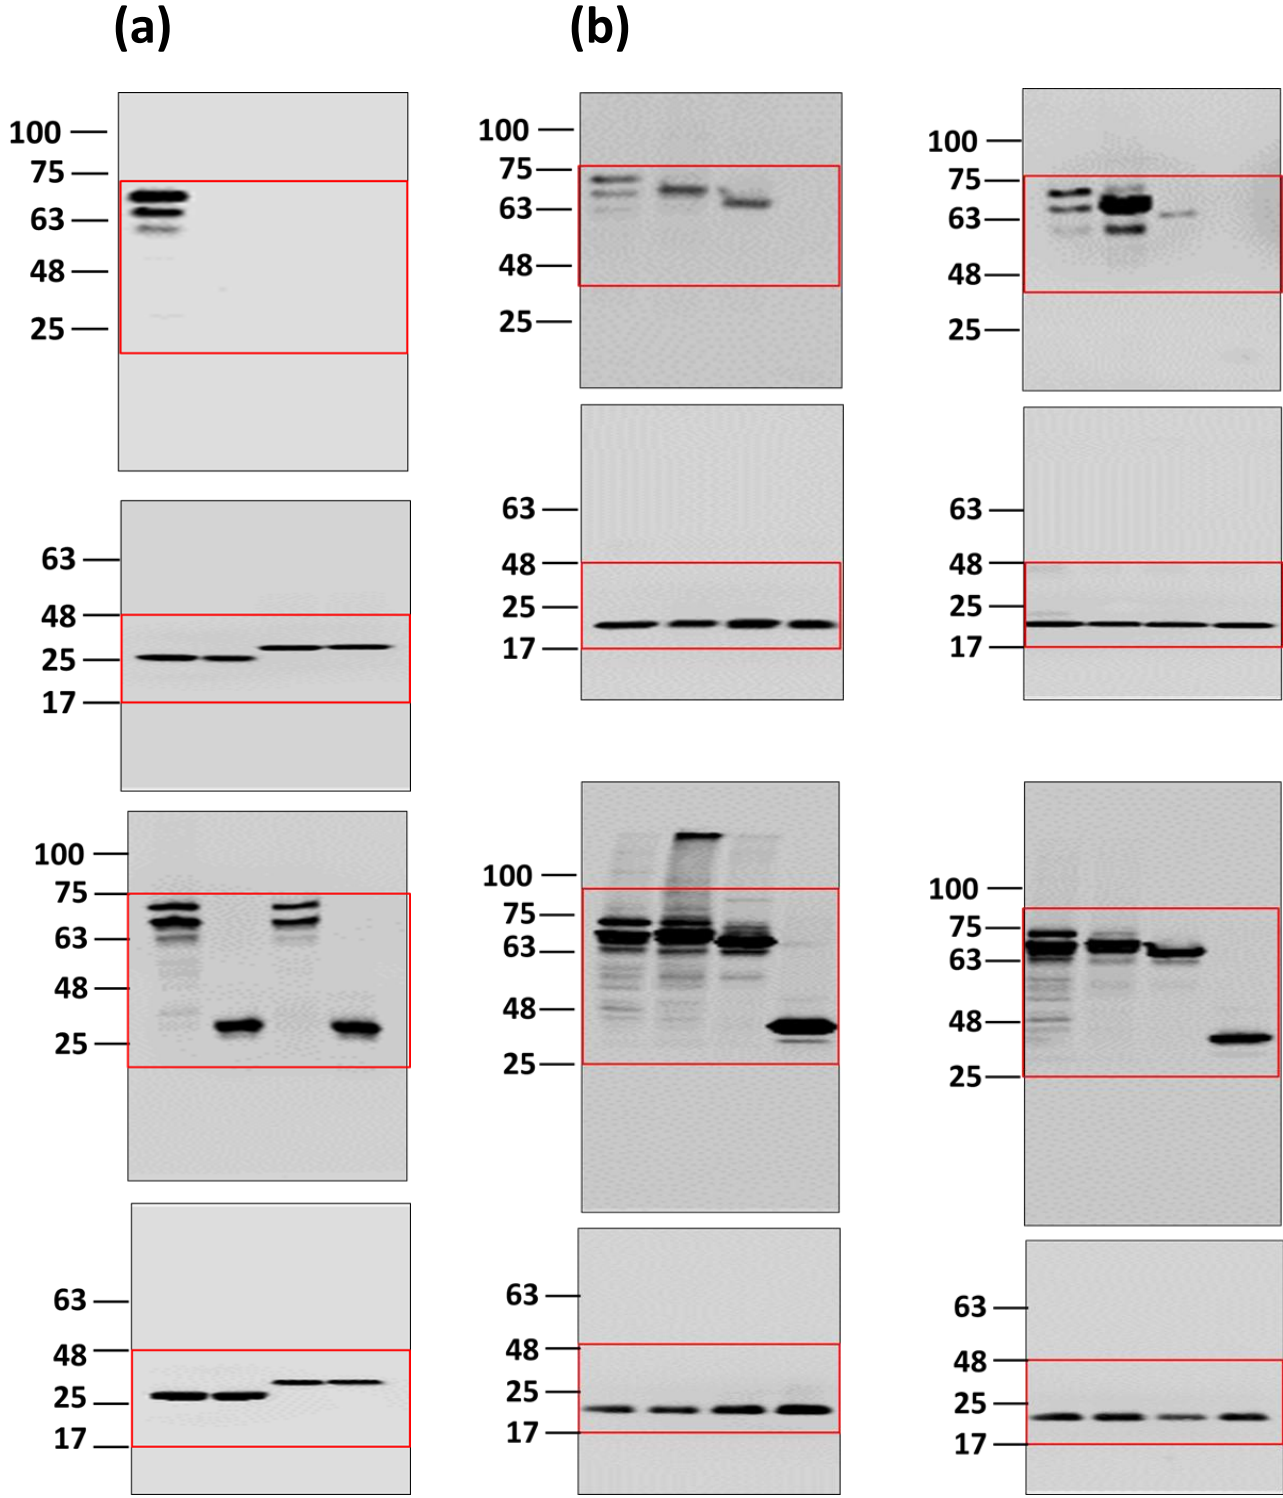

**Figure S2. E6 binds to the FAD domain of AIF. Related to Figure 3b**

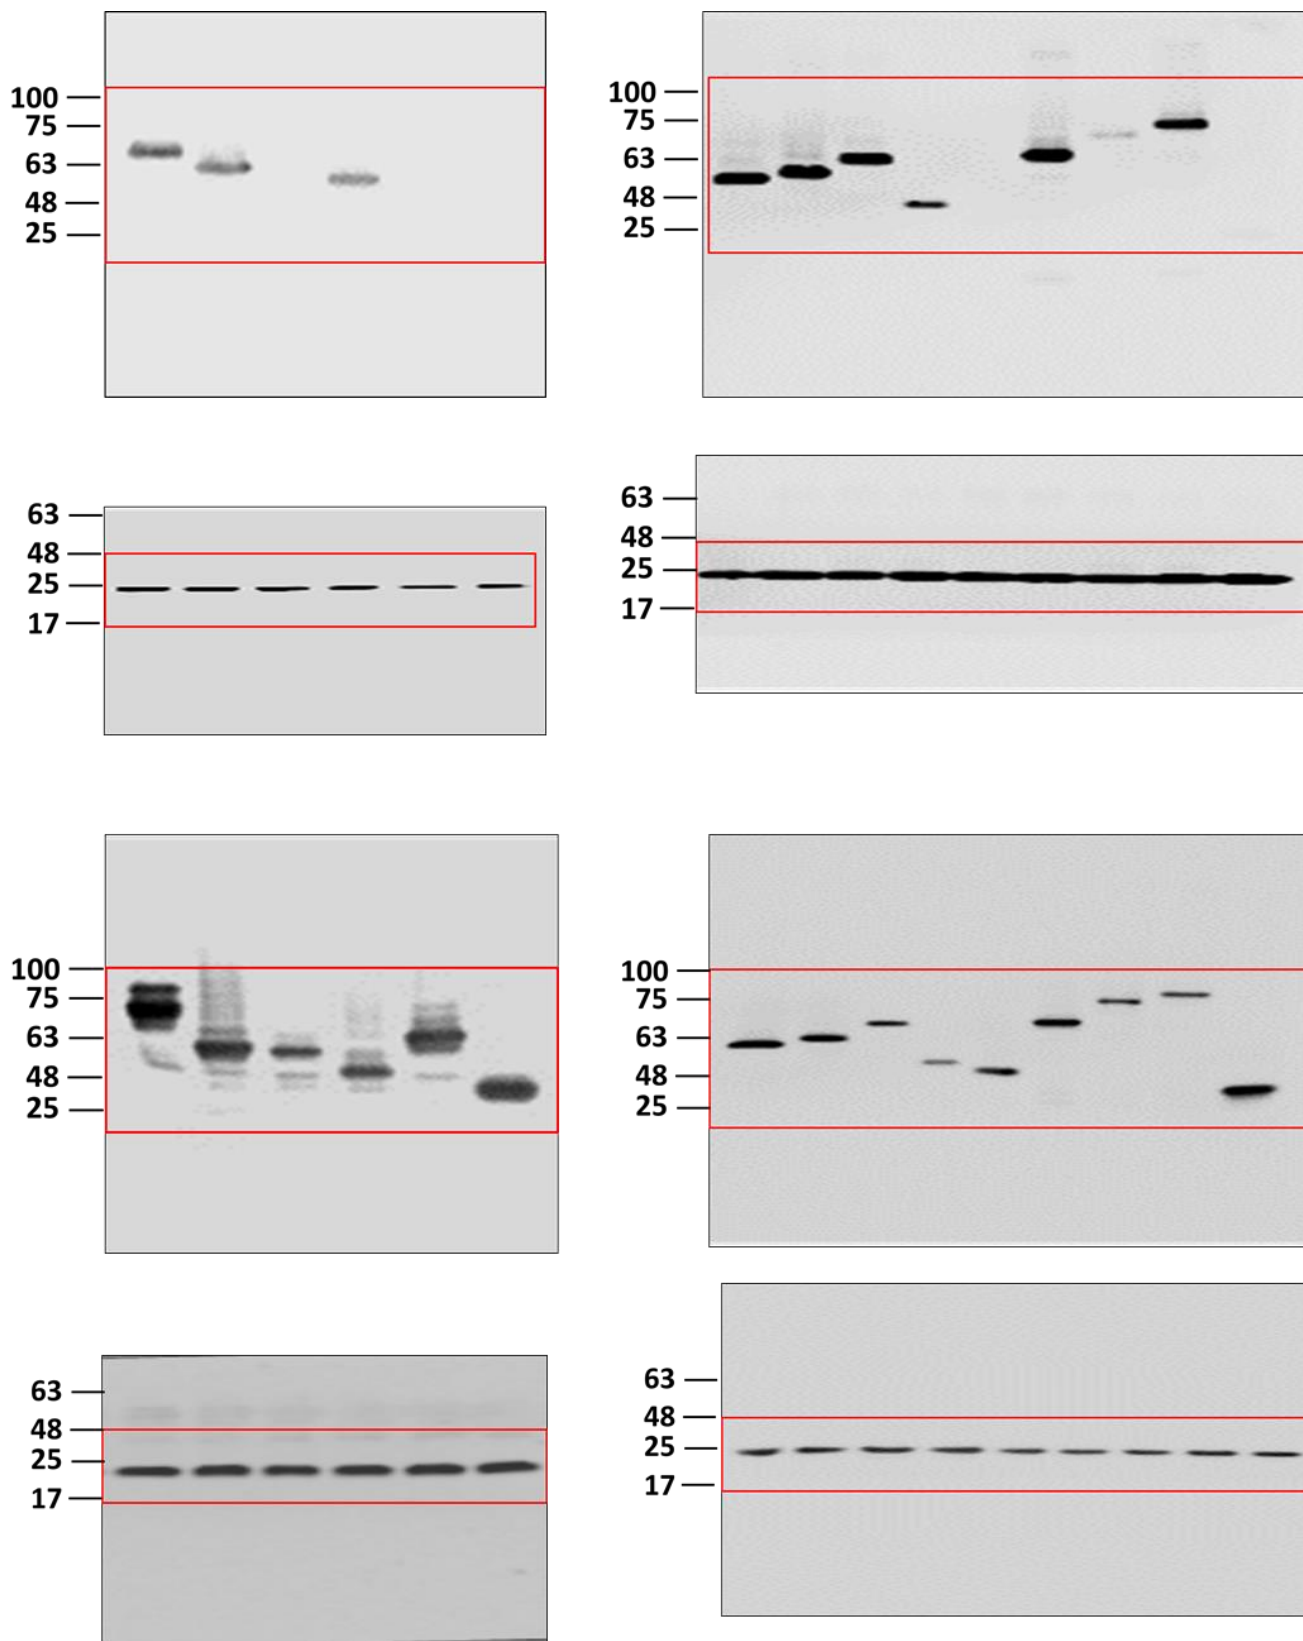

# Figure S3. Proteasomal degradation of AIF induced by E6. Related to Figure 5

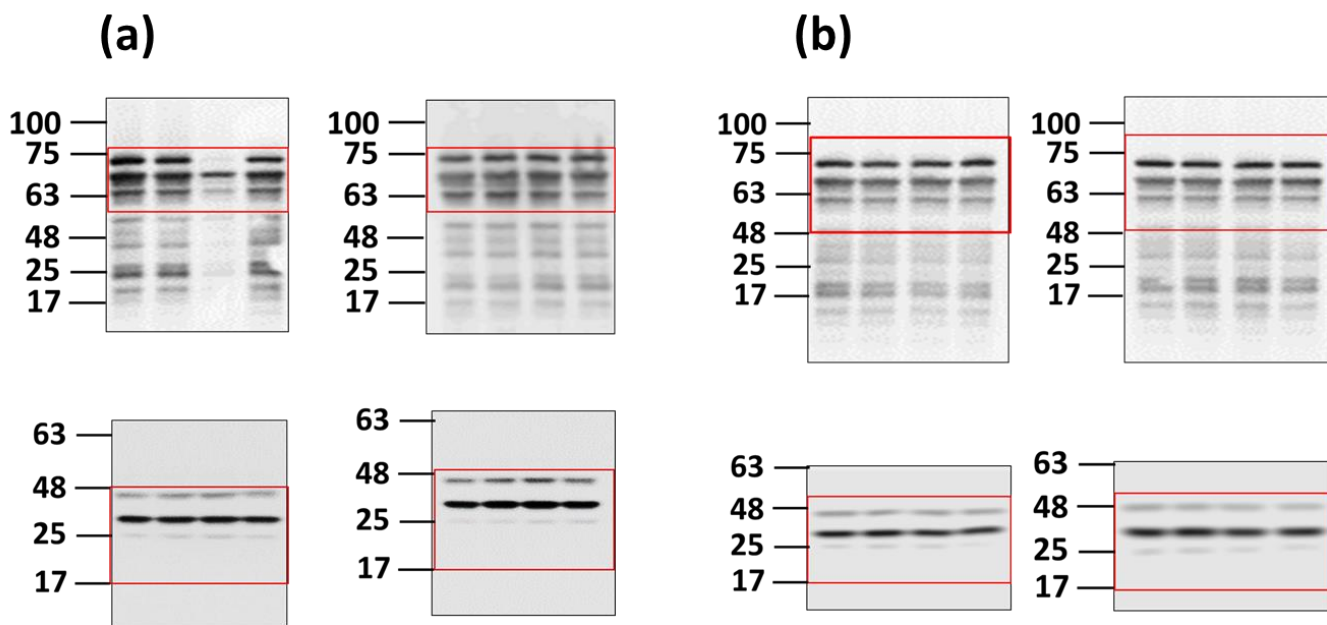

**Figure S4. Alignment of HPV E6 proteins among genotype. Alignment was performed using the ClustalW software.**

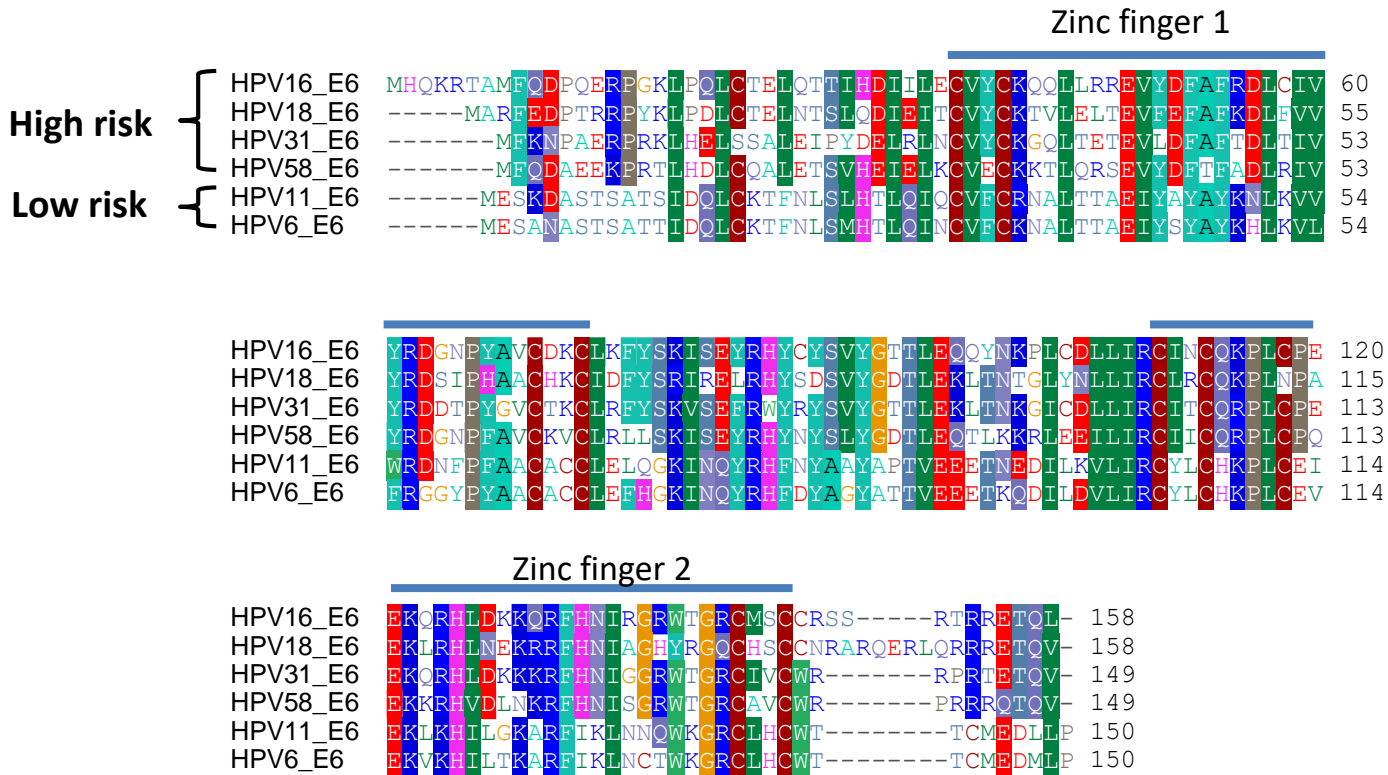

Supplement: 41598_2020_71134_MOESM2_ESM.pdf [file 41598_2020_71134_MOESM2_ESM.pdf]
